# Supplementary material
Source: PubMed Central journal article supplement (PMC3143582)
Supplement: JBJS_93_15_1408_E01.pdf [file JBJS_93_15_1408_E01.pdf]

TABLE E-1 Histological Grading Scale<sup>22\*</sup>

| Grade                                                              |                                                                                                                                                                                                                |
|--------------------------------------------------------------------|----------------------------------------------------------------------------------------------------------------------------------------------------------------------------------------------------------------|
| <b>I. Anulus fibrosus</b>                                          |                                                                                                                                                                                                                |
| 1                                                                  | Normal pattern of fibrocartilage lamellae (u-shaped in the posterior aspect and slightly convex in the anterior aspect) without ruptured fibers and without a serpentine appearance anywhere within the anulus |
| 2                                                                  | Ruptured or serpentine patterned fibers in <30% of the anulus                                                                                                                                                  |
| 3                                                                  | Ruptured or serpentine patterned fibers in >30% of the anulus                                                                                                                                                  |
| <b>II. Border between the anulus fibrosus and nucleus pulposus</b> |                                                                                                                                                                                                                |
| 1                                                                  | Normal                                                                                                                                                                                                         |
| 2                                                                  | Minimal interruption                                                                                                                                                                                           |
| 3                                                                  | Moderate/severe interruption                                                                                                                                                                                   |
| <b>III. Cellularity of the nucleus pulposus</b>                    |                                                                                                                                                                                                                |
| 1                                                                  | Normal cellularity with large vacuoles in the gelatinous structure of the matrix                                                                                                                               |
| 2                                                                  | Slight decrease in the number of cells and fewer vacuoles                                                                                                                                                      |
| 3                                                                  | Moderate/severe decrease (>50%) in the number of cells and no vacuoles                                                                                                                                         |
| <b>IV. Matrix of the nucleus pulposus</b>                          |                                                                                                                                                                                                                |
| 1                                                                  | Normal gelatinous appearance                                                                                                                                                                                   |
| 2                                                                  | Slight condensation of the extracellular matrix                                                                                                                                                                |
| 3                                                                  | Moderate/severe condensation of the extracellular matrix                                                                                                                                                       |

\*The histological grading scale is based on four categories of degenerative changes with scores ranging from 4 points (1 point in each category) for a normal disc to 12 points for a severely degenerated disc.
